# Supplementary material
Source: publisher site journal article supplement (https://www.dovepress.com/get_supplementary_file.php?f=286297.docx)
Supplement: Supplementary file 1 [file get_supplementary_file.php]

| **Supplementary table 1. Primers used in RT-PCR analysis** | |
| --- | --- |
| **Gene** | **Primer Sequence** |
| TLR2 (mouse) | 5'-GCAAACGCTGTTCTGCTCAG-3' |
|  | 5'-AGGCGTCTCCCTCTATTGTATT-3' |
| MyD88 (mouse) | 5'-TCATGTTCTCCATACCCTTGGT-3' |
|  | 5'-AAACTGCGAGTGGGGTCAG-3' |
| CXCL10 (mouse) | 5'-CCAAGTGCTGCCGTCATTTTC-3' |
|  | 5'-GGCTCGCAGGGATGATTTCAA-3' |
| ICAM1 (mouse) | 5'-GTGATGCTCAGGTATCCATCCA-3' |
|  | 5'-CACAGTTCTCAAAGCACAGCG-3' |
| IRF7 (mouse) | 5'-GAGACTGGCTATTGGGGGAG-3' |
|  | 5'-GACCGAAATGCTTCCAGGG-3' |
| CXCL1 (mouse) | 5'-CTGGGATTCACCTCAAGAACATC-3' |
|  | 5'-CAGGGTCAAGGCAAGCCTC-3' |
| VCAM1 (mouse) | 5'-AGTTGGGGATTCGGTTGTTCT-3' |
|  | 5'-CCCCTCATTCCTTACCACCC-3' |
| CCL5 (mouse) | 5'-GCTGCTTTGCCTACCTCTCC-3' |
|  | 5'-TCGAGTGACAAACACGACTGC-3' |
| CCL4 (mouse) | 5'-TTCCTGCTGTTTCTCTTACACCT-3' |
|  | 5'-CTGTCTGCCTCTTTTGGTCAG-3' |
| CXCL2 (mouse) | 5'-CCAACCACCAGGCTACAGG-3' |
|  | 5'-GCGTCACACTCAAGCTCTG-3' |
| NFκB-IA (mouse) | 5'-ATGGCAGACGATGATCCCTAC-3' |
|  | 5'-TGTTGACAGTGGTATTTCTGGTG-3' |
| CSF2 (mouse) | 5'-GGCCTTGGAAGCATGTAGAGG-3' |
|  | 5'-GGAGAACTCGTTAGAGACGACTT-3' |
| SOCS3 (mouse) | 5'-ATGGTCACCCACAGCAAGTTT-3' |
|  | 5'-TCCAGTAGAATCCGCTCTCCT-3' |
| TNFAIP3 (mouse) | 5'-ACAGTGGACCTGGTAAGAAAACA-3' |
|  | 5'-CCTCCGTGACTGATGACAAGAT-3' |
| SELP (mouse) | 5'-CATCTGGTTCAGTGCTTTGATCT-3' |
|  | 5'-ACCCGTGAGTTATTCCATGAGT-3' |
| IFIT2 (mouse) | 5'-AGTACAACGAGTAAGGAGTCACT-3' |
|  | 5'-AGGCCAGTATGTTGCACATGG-3' |
| RSAD2 (mouse) | 5'-TGCTGGCTGAGAATAGCATTAGG-3' |
|  | 5'-GCTGAGTGCTGTTCCCATCT-3' |
| TNF-α (mouse) | 5'-CCTGTAGCCCACGTCGTAG-3' |
|  | 5'-GGGAGTAGACAAGGTACAACCC-3' |
| IL-1β (mouse) | 5'-GAAATGCCACCTTTTGACAGTG-3' |
|  | 5'-TGGATGCTCTCATCAGGACAG-3' |
| CCL2 (mouse) | 5'-TTAAAAACCTGGATCGGAACCAA |
|  | 5'-GCATTAGCTTCAGATTTACGGGT-3' |
| IL-6 (mouse) | 5'-CTGCAAGAGACTTCCATCCAG-3' |
|  | 5'-AGTGGTATAGACAGGTCTGTTGG-3' |
| TNF-α (human) | 5'-GAGGCCAAGCCCTGGTATG-3' |
|  | 5'-CGGGCCGATTGATCTCAGC-3' |
| IL-1β (human) | 5'-ATGATGGCTTATTACAGTGGCAA-3' |
|  | 5'-GTCGGAGATTCGTAGCTGGA-3' |
| IL-6 (human) | 5'-ACTCACCTCTTCAGAACGAATTG-3' |
|  | 5'-CCATCTTTGGAAGGTTCAGGTTG-3' |
| VCAM1 (human) | 5'-TTTGACAGGCTGGAGATAGACT-3' |
|  | 5'-TCAATGTGTAATTTAGCTCGGCA-3' |


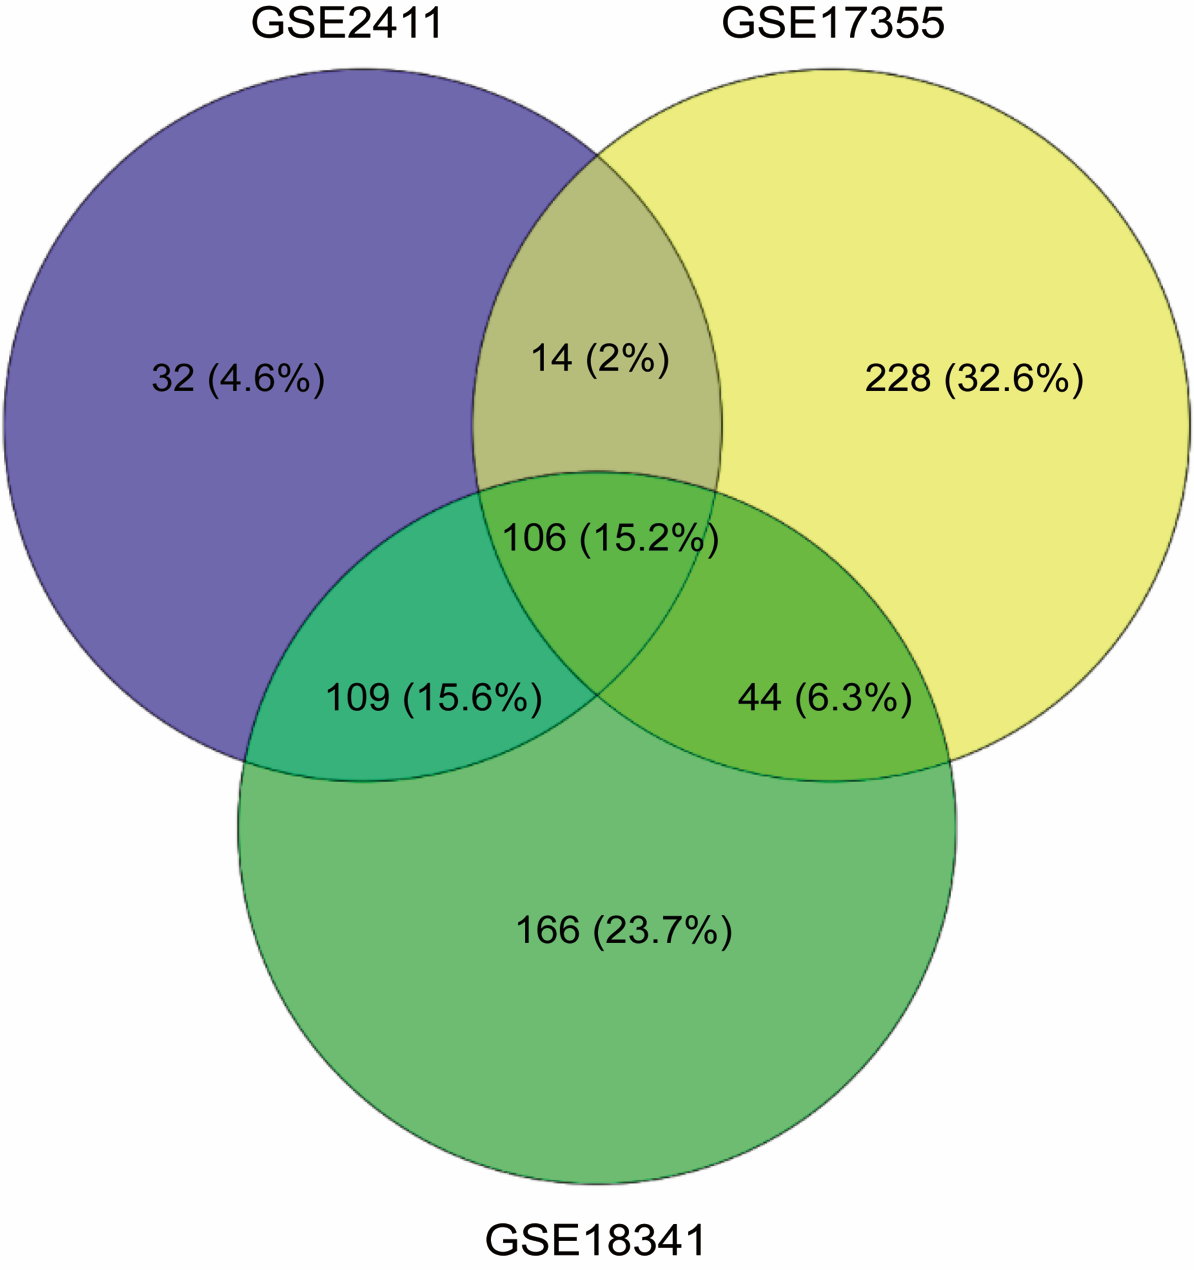


**Figure. S1.** Overlapping of 106 DEGs across the datasets were identified by Venn diagram.
